# Supplementary material
Source: MDPI journal article supplement (https://www.mdpi.com/2673-6756/3/2/25)
Supplement: s1 [file s1]

**Table S1.** Linear Coefficient determination, LODs and LLO ng/ml and upper limit of quantification for all specimens of interest in the current study (n=5).

|                  |               | $R^2$ * | LDR**    | intercept | STDV (intercept) & | Slope    | LOD ¥ | LOQ $\phi$ |           |                          | ULOQ $\epsilon$      | Unit       |
|------------------|---------------|---------|----------|-----------|--------------------|----------|-------|------------|-----------|--------------------------|----------------------|------------|
|                  |               |         |          |           |                    |          |       | LOQ        | %E $\neq$ | Within run<br>(%CV) $\#$ | Between run<br>(%CV) |            |
| Blood            | THC *         | 0.999   | 0.5-1000 | 0.033213  | 0.002936           | 0.011706 | 0.8   | 1.0        | 2         | 8                        | 7                    | 1000 ng/mL |
|                  | THC-COOH $\#$ | 0.999   | 0.5-1000 | 0.092429  | 0.006624           | 0.0305   | 0.7   | 1.0        | -3        | 5                        | 4                    | 1000 ng/mL |
|                  | THC-OH $\neq$ | 0.999   | 0.5-1000 | 0.018326  | 0.001949           | 0.009576 | 0.7   | 1.0        | 2         | 7                        | 6                    | 1000 ng/mL |
| Urine            | THC           | 0.999   | 0.5-1000 | 0.031662  | 0.001894           | 0.012125 | 0.5   | 1.0        | -2        | 8                        | 7                    | 1000 ng/mL |
|                  | THC-COOH      | 0.999   | 0.5-1000 | 0.130149  | 0.006481           | 0.030554 | 0.7   | 1.0        | 9         | 6                        | 6                    | 1000 ng/mL |
|                  | THC-OH        | 0.998   | 0.5-1000 | 0.03322   | 0.001356           | 0.009004 | 0.5   | 1.0        | 2         | 5                        | 6                    | 1000 ng/mL |
| Vitreous humor   | THC           | 0.999   | 0.5-1000 | 0.000385  | 0.000215           | 0.001746 | 0.4   | 1.0        | 7.0       | 10.0                     | 6.0                  | 1000 ng/mL |
|                  | THC-COOH      | 0.999   | 0.5-1000 | 0.028717  | 0.007513           | 0.053753 | 0.5   | 1.0        | 3.0       | 4.0                      | 2.0                  | 1000 ng/mL |
|                  | THC-OH        | 0.999   | 0.5-1000 | 0.001499  | 0.000269           | 0.001304 | 0.7   | 1.0        | 1.0       | 4.0                      | 3.0                  | 1000 ng/mL |
| Bile             | THC           | 0.999   | 0.5-1000 | 0.005016  | 0.002582           | 0.011667 | 0.7   | 1.0        | 3         | 9                        | 7                    | 1000 ng/mL |
|                  | THC-COOH      | 0.999   | 0.5-1000 | 0.113291  | 0.008576           | 0.035572 | 0.8   | 1.0        | 2         | 11                       | 9                    | 1000 ng/mL |
|                  | THC-OH        | 0.998   | 0.5-1000 | 0.013309  | 0.001661           | 0.00905  | 0.6   | 1.0        | 4         | 10                       | 10                   | 1000 ng/mL |
| Gastric contents | THC           | 0.998   | 0.5-1000 | -0.04347  | 0.00357            | 0.011506 | 1.0   | 2.0        | 5         | 12                       | 11                   | 1000 ng/mL |
|                  | THC-COOH      | 0.995   | 0.5-1000 | 0.13838   | 0.010839           | 0.031727 | 1.1   | 2.0        | 6         | 8                        | 6                    | 1000 ng/mL |
|                  | THC-OH        | 0.996   | 0.5-1000 | 0.03421   | 0.003476           | 0.008908 | 1.3   | 2.0        | 4         | 5                        | 6                    | 1000 ng/mL |
| Brain            | THC           | 0.998   | 0.5-1000 | 0.000564  | 0.000268           | 0.002498 | 0.4   | 1.0        | -1.0      | 6.0                      | 6.0                  | 1000 ng/mL |
|                  | THC-COOH      | 0.995   | 0.5-1000 | -0.01735  | 0.004095           | 0.055885 | 0.2   | 1.0        | -4.0      | 10.0                     | 11.0                 | 1000 ng/g  |
|                  | THC-OH        | 0.996   | 0.5-1000 | 0.002364  | 0.000392           | 0.00242  | 0.5   | 1.0        | -6.0      | 11.0                     | 7.0                  | 1000 ng/g  |
| Liver            | THC           | 0.999   | 0.5-1000 | 0.000333  | 0.000399           | 0.001718 | 0.8   | 1.0        | 5.0       | 11.0                     | 10.0                 | 1000 ng/g  |
|                  | THC-COOH      | 0.999   | 0.5-1000 | 0.000609  | 0.000244           | 0.001712 | 0.5   | 1.0        | 2.0       | 7.0                      | 3.0                  | 1000 ng/g  |
|                  | THC-OH        | 0.999   | 0.5-1000 | 0.000279  | 0.000107           | 0.001374 | 0.3   | 1.0        | 3.0       | 9.0                      | 5.0                  | 1000 ng/g  |

\* THC:  $\Delta$ 9-tetrahydrocannabinol;  $\#$ THC-COOH: 11-nor-  $\Delta$ 9-THC-9-carboxylic acid ;  $\neq$ : THC-OH: 11-hydroxy-  $\Delta$ 9-THC

**Table S2.** Method validation parameters for the analysis of  $\Delta^9$ -tetrahydrocannabinol and its metabolites using Liquid chromatography tandem mass spectrometry.

|                            |                                           |                       | Precision                    |        |      |      |
|----------------------------|-------------------------------------------|-----------------------|------------------------------|--------|------|------|
|                            | Analytes                                  |                       | Low                          | Medium | High |      |
| Specimens                  |                                           | Nominal concentration | 5                            | 25     | 750  |      |
|                            |                                           |                       | Measured Concentration ng/ml |        |      |      |
| Blood with sodium fluoride | $\Delta 9$ -tetrahydrocannabinol (THC)    | Mean (ng/g)           | 5                            | 25     | 752  |      |
|                            |                                           | STDEV±                | 0.5                          | 0.6    | 28.7 |      |
|                            |                                           | % E *                 | -4                           | -1     | 1    |      |
|                            |                                           | Within Run %CV**      | 7                            | 2      | 3    |      |
|                            |                                           | Between Run %CV       | 8                            | 2      | 2    |      |
|                            | 11-nor- $\Delta 9$ -THC-9-carboxylic acid | Mean (ng/g)           | 5                            | 25     | 745  |      |
|                            |                                           | STDEV±                | 0.6                          | 0.8    | 9.0  |      |
|                            |                                           | % E                   | -5                           | -1     | -1   |      |
|                            |                                           | Within Run %CV        | 9                            | 4      | 2    |      |
|                            |                                           | Between Run %CV       | 8                            | 3      | 1    |      |
|                            | 11-hydroxy- $\Delta 9$ -THC               | Mean (ng/g)           | 5                            | 25     | 746  |      |
|                            |                                           | STDEV±                | 0.4                          | 0.7    | 11.3 |      |
|                            |                                           | % E                   | -3                           | -1     | 1    |      |
|                            |                                           | Within Run %CV        | 6                            | 3      | 4    |      |
|                            |                                           | Between Run %CV       | 4                            | 1      | 2    |      |
| THC                        | Mean (ng/g)                               | 5                     | 25                           | 757    |      |      |
|                            | STDEV±                                    | 0.4                   | 0.7                          | 32.4   |      |      |
|                            | % E                                       | -6                    | 1                            | 1      |      |      |
|                            | Within Run %CV                            | 8                     | 2                            | 4      |      |      |
|                            | Between Run %CV                           | 7                     | 3                            | 4      |      |      |
| Urine                      | 11-nor- $\Delta 9$ -THC-9-carboxylic acid | Mean (ng/g)           | 5                            | 25     | 757  |      |
|                            |                                           | STDEV±                | 0.4                          | 0.7    | 32.4 |      |
|                            |                                           | % E                   | -2                           | 1      | 1    |      |
|                            |                                           | Within Run %CV        | 6                            | 3      | 4    |      |
|                            |                                           | Between Run %CV       | 8                            | 2      | 4    |      |
|                            | 11-hydroxy- $\Delta 9$ -THC               | Mean (ng/g)           | 5                            | 25     | 756  |      |
|                            |                                           | STDEV±                | 0.4                          | 0.8    | 4.9  |      |
|                            |                                           | % E                   | -2                           | 1      | 1    |      |
|                            |                                           | Within Run %CV        | 7                            | 3      | 3    |      |
|                            |                                           | Between Run %CV       | 6                            | 3      | 2    |      |
|                            | Vitreous humor                            | THC                   | Mean (ng/g)                  | 5      | 25   | 759  |
|                            |                                           |                       | STDEV±                       | 0.4    | 0.6  | 23.6 |
|                            |                                           |                       | % E                          | -4     | 1    | 1    |

|                  |                                           |                 |     |     |      |
|------------------|-------------------------------------------|-----------------|-----|-----|------|
| Gastric contents | 11-nor- $\Delta^9$ -THC-9-carboxylic acid | Within Run %CV  | 9   | 2   | 3    |
|                  |                                           | Between Run %CV | 8   | 2   | 3    |
|                  |                                           | Mean (ng/g)     | 5   | 25  | 757  |
|                  | 11-hydroxy- $\Delta^9$ -THC               | STDEV $\pm$     | 0.4 | 0.4 | 15.0 |
|                  |                                           | % E             | -5  | 1   | 1    |
|                  |                                           | Within Run %CV  | 8   | 3   | 2    |
|                  | THC                                       | Between Run %CV | 7   | 2   | 2    |
|                  |                                           | Mean (ng/g)     | 5   | 25  | 762  |
|                  |                                           | STDEV $\pm$     | 0.4 | 0.7 | 8    |
|                  | 11-nor- $\Delta^9$ -THC-9-carboxylic acid | % E             | -3  | -1  | 2    |
|                  |                                           | Within Run %CV  | 10  | 1   | 3    |
|                  |                                           | Between Run %CV | 9   | 3   | 3    |
|                  | 11-hydroxy- $\Delta^9$ -THC               | Mean (ng/g)     | 5   | 25  | 742  |
|                  |                                           | STDEV $\pm$     | 0.4 | 0.5 | 18   |
|                  |                                           | % E             | -8  | -1  | 1    |
|                  | THC                                       | Within Run %CV  | 9   | 3   | 3    |
|                  |                                           | Between Run %CV | 7   | 3   | 4    |
|                  |                                           | Mean (ng/g)     | 5   | 25  | 754  |
|                  | 11-nor- $\Delta^9$ -THC-9-carboxylic acid | STDEV $\pm$     | 0.5 | 0.4 | 10.4 |
|                  |                                           | % E             | -4  | -2  | 1    |
|                  |                                           | Within Run %CV  | 11  | 2   | 3    |
|                  | 11-hydroxy- $\Delta^9$ -THC               | Between Run %CV | 10  | 3   | 4    |
|                  |                                           | Mean (ng/g)     | 5   | 24  | 764  |
|                  |                                           | STDEV $\pm$     | 0.4 | 1.1 | 29   |
|                  | THC                                       | % E             | -5  | -3  | 2    |
|                  |                                           | Within Run %CV  | 8   | 4   | 3    |
|                  |                                           | Between Run %CV | 8   | 4   | 4    |
| Bile             | 11-nor- $\Delta^9$ -THC-9-carboxylic acid | Mean (ng/g)     | 5   | 25  | 769  |
|                  |                                           | STDEV $\pm$     | 0.3 | 0.6 | 27   |
|                  |                                           | % E             | -3  | 2   | 3    |
|                  | 11-hydroxy- $\Delta^9$ -THC               | Within Run %CV  | 9   | 2   | 4    |
|                  |                                           | Between Run %CV | 10  | 2   | 3    |
|                  |                                           | Mean (ng/g)     | 5   | 25  | 761  |
|                  | THC                                       | STDEV $\pm$     | 0.4 | 0.4 | 17   |
|                  |                                           | % E             | -1  | 2   | 1    |
|                  |                                           | Within Run %CV  | 6   | 1   | 5    |
|                  | 11-nor- $\Delta^9$ -THC-9-carboxylic acid | Between Run %CV | 7   | 2   | 5    |
|                  |                                           | Mean (ng/g)     | 5   | 25  | 755  |
|                  |                                           | STDEV $\pm$     | 0.3 | 0.2 | 21   |
|                  | 11-hydroxy- $\Delta^9$ -THC               | % E             | -4  | 1   | 1    |
|                  |                                           | Within Run %CV  | 10  | 3   | 3    |
|                  |                                           | Between Run %CV | 8   | 2   | 3    |

|                |                                  |                 |      |      |       |
|----------------|----------------------------------|-----------------|------|------|-------|
| Brain          | THC                              | Between Run %CV | 10   | 3    | 2     |
|                |                                  | Mean (ng/g)     | 4.9  | 25.2 | 758.0 |
|                |                                  | STDEV±          | 0.3  | 0.6  | 10.9  |
|                |                                  | % E             | -3   | 0.6  | 1     |
|                | Within Run %CV                   | 7               | 5    | 2    |       |
|                | 11-nor- Δ9-THC-9-carboxylic acid | Between Run %CV | 2    | 3    | 1     |
|                |                                  | Mean (ng/g)     | 4.9  | 25.8 | 754.2 |
|                |                                  | STDEV±          | 0.4  | 0.8  | 9.3   |
|                |                                  | % E             | -1   | 3.1  | 0.6   |
|                | Within Run %CV                   | 6               | 2    | 2    |       |
|                | 11-hydroxy- Δ9-THC               | Between Run %CV | 2    | 3    | 2     |
|                |                                  | Mean (ng/g)     | 4.9  | 25.5 | 752.6 |
| STDEV±         |                                  | 0.2             | 0.9  | 11.4 |       |
| % E            |                                  | -1              | 1.8  | 0.3  |       |
| Liver          | THC                              | Within Run %CV  | 4    | 4    | 1     |
|                |                                  | Between Run %CV | 5    | 2    | 1     |
|                |                                  | Mean (ng/g)     | 5    | 25   | 746   |
|                |                                  | STDEV±          | 0.2  | 0.7  | 8.3   |
|                | % E *                            | 1               | -0.7 | -0.5 |       |
|                | Within Run %CV **                | 4               | 3    | 1    |       |
|                | 11-nor- Δ9-THC-9-carboxylic acid | Between Run %CV | 5    | 3    | 1     |
|                |                                  | Mean (ng/g)     | 5    | 26   | 745   |
|                |                                  | STDEV±          | 0.2  | 1.1  | 14.3  |
|                |                                  | % E             | 1    | 3    | -1    |
|                | Within Run %CV                   | 6               | 4    | 2    |       |
|                | 11-hydroxy- Δ9-THC               | Between Run %CV | 3    | 4    | 2     |
| Mean (ng/g)    |                                  | 5               | 25   | 755  |       |
| STDEV±         |                                  | 0.3             | 1.2  | 8.2  |       |
| % E            |                                  | -7              | 1    | 1    |       |
| Within Run %CV | 4                                | 1               | 1    |      |       |
| Kidney         | THC                              | Between Run %CV | 1    | 2    | 2     |
|                |                                  | Mean (ng/g)     | 5.0  | 25   | 748.6 |
|                |                                  | STDEV±          | 0.3  | 0.8  | 24.0  |
|                |                                  | % E             | 1    | 5    | -0.2  |
| Within Run %CV | 7                                | 2               | 3    |      |       |

|                                           |                 |     |      |     |
|-------------------------------------------|-----------------|-----|------|-----|
| 11-nor- $\Delta^9$ -THC-9-carboxylic acid | Between Run %CV | 4   | 3    | 3   |
|                                           | Mean (ng/g)     | 5   | 26   | 747 |
|                                           | STDEV $\pm$     | 0.4 | 1.5  | 9.4 |
|                                           | % E             | -2  | 8    | 1   |
|                                           | Within Run %CV  | 6   | 4    | 2   |
|                                           | Between Run %CV | 3   | 2    | 1   |
| 11-hydroxy- $\Delta^9$ -THC               | Mean (ng/g)     | 5   | 25   | 755 |
|                                           | STDEV $\pm$     | 0.3 | 0.8  | 8.3 |
|                                           | % E             | -2  | -0.6 | 1   |
|                                           | Within Run %CV  | 8   | 3    | 2   |
|                                           | Between Run %CV | 4   | 3    | 1   |

\* %E: Relative error, \*\*CV %: the coefficient of variation; ¥¥ Blood+ naf: blood with sodium fluoride

**Table S3.** Demography of 43 postmortem cases included in this work.

| Case no | Sex    | Age  | Weight | Hight | BMI  | Other drugs                                        | History & cause of death                        |
|---------|--------|------|--------|-------|------|----------------------------------------------------|-------------------------------------------------|
|         |        | Year | Kg     | Cm    |      |                                                    |                                                 |
| 1       | Male   | 20   | 70     | 170   | 24.2 | Amphetamine, Tadalafil, Cocaine                    | Drugs overdose                                  |
| 2       | Male   | 23   | 90     | 170   | 31.1 | Benzoyllecgonine, Alprazolam, Morphine, Tramadol   | Drug overdose                                   |
| 3       | Male   | 25   | 65     | 172   | 22.0 | Bromodiphenhydramine                               | History of drug abuse, Fall from high           |
| 4       | Male   | 20   | 60     | 170   | 20.8 | Amphetamine, Carboxyhaemoglobin, Methamphetamine   | Fire related deaths                             |
| 5       | Male   | 16   | 60     | 167   | 21.5 | Amphetamine, Methamphetamine                       | Died due to stab wound                          |
| 6       | Male   | 33   | 60     | 180   | 18.5 | Tramadol                                           | Died due to stab wound                          |
| 7       | Male   | 33   | 75     | 173   | 25.1 | Amphetamine                                        | Car accident                                    |
| 8       | Male   | 29   | 90     | 167   | 32.3 | Amphetamine, Quetiapine, Methamphetamine           | History of drug abuse /Suicidal firearm injury  |
| 9       | Male   | 26   | 90     | 175   | 29.4 | Amphetamine                                        | Drugs overdose, bleeding                        |
| 10      | Female | 35   | 90     | 164   | 33.5 | Amphetamine, Methamphetamine                       | Fall from high                                  |
| 11      | Male   | 59   | 110    | 175   | 35.9 | None                                               | Natural death                                   |
| 12      | Female | 23   | 80     | 164   | 29.7 | Amphetamine, Methamphetamine                       | Fall from high (Partially putrefied case)       |
| 13      | Male   | 24   | 80     | 167   | 28.7 | Amphetamine, Methamphetamine                       | Sinking                                         |
| 14      | Female | 28   | 50     | 155   | 20.8 | Quetiapine                                         | Natural death                                   |
| 15      | Male   | 40   | 55     | 165   | 20.2 | Quetiapine                                         | Bleeding from nose and mouth                    |
| 16      | Male   | 66   | 60     | 160   | 23.4 | Amphetamine,                                       | History of pressure and diabetic, natural death |
| 17      | Male   | 29   | 95     | 176   | 30.7 | Midazolam,                                         | Head injury                                     |
| 18      | Male   | 45   | 60     | 158   | 24.0 | Amphetamine                                        | Stab wound                                      |
| 19      | Male   | 21   | 70     | 173   | 23.4 | None                                               | Natural death                                   |
| 20      | Male   | 25   | 80     | 170   | 27.7 | Amphetamine, Tramadol, Alprazolam, Methamphetamine | Natural death                                   |
| 21      | Male   | 24   | 75     | 169   | 26.3 | Diazepam, Codeine                                  | Natural death (Partially putrefied case)        |
| 22      | Male   | 19   | 80     | 170   | 27.7 | None                                               | drug of abuse                                   |
| 23      | Male   | 60   | 90     | 178   | 28.4 | None                                               | Fall from high. (Heavily putrefied case)        |
| 24      | Male   | 40   | 85     | 171   | 29.1 | Amphetamine                                        | History of HBV, HCV, HIV/ Fall from high        |
| 25      | Male   | 63   | 90     | 179   | 28.1 | Ethanol, Tadalafil                                 | Natural death                                   |
| 26      | Male   | 27   | 80     | 180   | 24.7 | Amphetamine, Methamphetamine                       | Fall from high                                  |
| 27      | Male   | 35   | 70     | 170   | 24.2 | Amphetamine                                        | drug of abuse                                   |

|    |      |    |    |     |      |                                                            |                                             |
|----|------|----|----|-----|------|------------------------------------------------------------|---------------------------------------------|
|    |      |    |    |     |      | Ethanol,<br>Tramadol                                       | (Heavily putrefied case)                    |
| 28 | Male | 25 | 70 | 168 | 24.8 | Ethanol,<br>Clonazepam<br>Gabapentin,                      | Stab wound                                  |
| 29 | Male | 29 | 70 | 171 | 23.9 | Diazepam<br>Cocaine<br>Ethanol                             | Firearm injury                              |
| 30 | Male | 30 | 80 | 175 | 26.1 | None                                                       | Fall from high                              |
| 31 | Male | 26 | 75 | 170 | 26.0 | None                                                       | Firearm injury                              |
| 32 | Male | 28 | 70 | 170 | 24.2 | Amphetamine                                                | Firearm injury                              |
| 33 | Male | 30 | 75 | 160 | 29.3 | Amphetamine                                                | Natural death/ History of<br>drug abuse     |
| 34 | Male | 37 | 90 | 173 | 30.1 | Amphetamine                                                | Natural death                               |
| 35 | Male | 30 | 70 | 170 | 24.2 | Amphetamine<br>Methamphetamine                             | Stabbing                                    |
| 36 | Male | 50 | 80 | 176 | 25.8 | None                                                       | Natural death                               |
| 37 | Male | 32 | 80 | 180 | 24.7 | Alprazolam                                                 | Sinking                                     |
| 38 | Male | 30 | 88 | 173 | 29.4 | Amphetamine,<br>Lidocaine,<br>Morphine                     | Natural death<br>(Partially putrefied case) |
| 39 | Male | 22 | 60 | 175 | 19.6 | Amphetamine,<br>galantamine, , Alprazolam                  | Hanging                                     |
| 40 | Male | 40 | 70 | 169 | 24.5 | Amphetamine, Lidocaine                                     | Stabbing                                    |
| 41 | Male | 25 | 90 | 171 | 30.8 | Amphetamine                                                | Electric shock                              |
| 42 | Male | 30 | 70 | 170 | 24.2 | Amphetamine                                                | Died in desert                              |
| 43 | Male | 30 | 70 | 162 | 26.7 | Amphetamine,<br>Methamphetamine,<br>Alprazolam,<br>Opiate, | Drug of abuse                               |
